# Supplementary material for: The residence time of water in the atmosphere revisited
Source: Copernicus journal article supplement (doi:10.5194/hess-2016-431), 2016-09-01
Supplement: Supplementary file 1 [file hess-2016-431-supplement.zip]

# The residence time of water in the atmosphere revisited

Ruud J. van der Ent<sup>1</sup> and Obbe A. Tuinenburg<sup>2</sup>

<sup>1</sup>Department of Physical Geography, Faculty of Geosciences, Utrecht University, Utrecht, the Netherlands

<sup>2</sup>Department of Environmental Sciences, Copernicus Institute for Sustainable development, Utrecht University, Utrecht, the Netherlands

Correspondence to: Ruud J. van der Ent (r.j.vanderent@uu.nl)

## Supplement

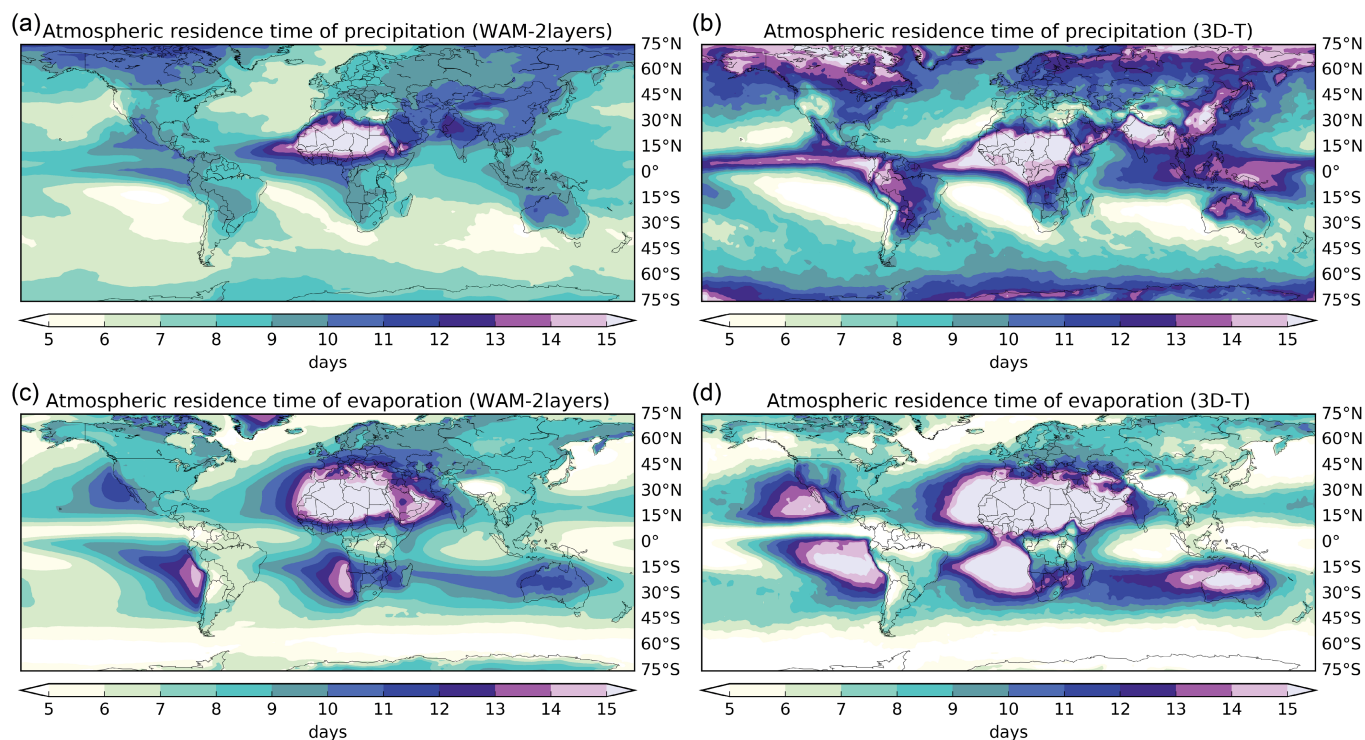

**Figure S 1.** Annual average atmospheric residence times for 2002–2008, based on ERA-Interim data. (a) Residence time of precipitation as computed by WAM-2layers. (b) Residence time of precipitation as computed by 3D-Trajectories. (c) as (a) for evaporation. (d) As (b) for evaporation.

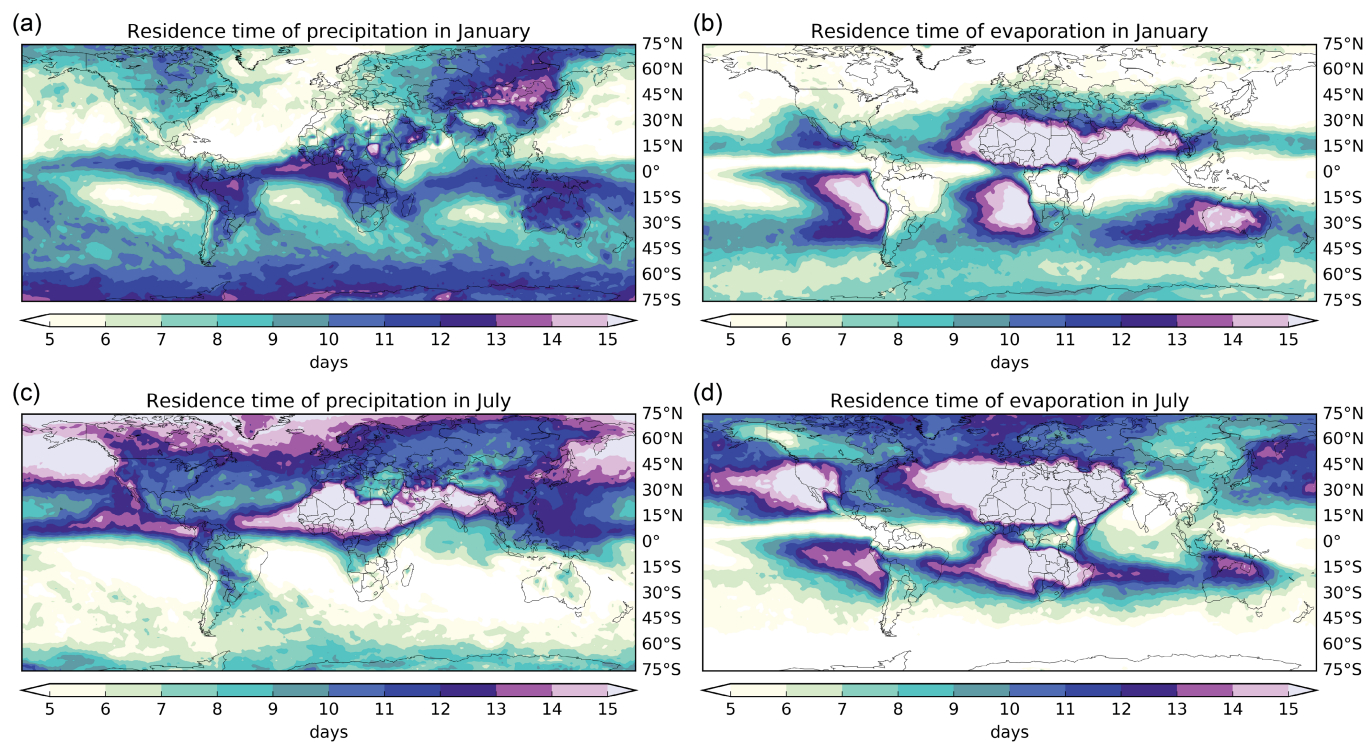

**Figure S 2.** Atmospheric residence times in January and July for 2002–2008, based on ERA-Interim data (averages of WAM-2layers and 3D-T).
