# Supplementary material for: The residence time of water in the atmosphere revisited
Source: Copernicus journal article supplement (doi:10.5194/hess-2016-431), 2016-09-01
Supplement: Supplementary file 2 [file hess-2016-431-supplement.zip]

Archive with 2 entries (2 files):
- Animation1.mp4
- VanderEnt_and_Tuinenburg2016_supplement.pdf
